# Supplementary material for: Two novel variants in DYRK1B causative of AOMS3: expanding the clinical spectrum
Source: Springer Nature journal article supplement (doi:10.1186/s13023-021-01924-z), 2021-06-30
Supplement: MOESM1 [file 19315914]

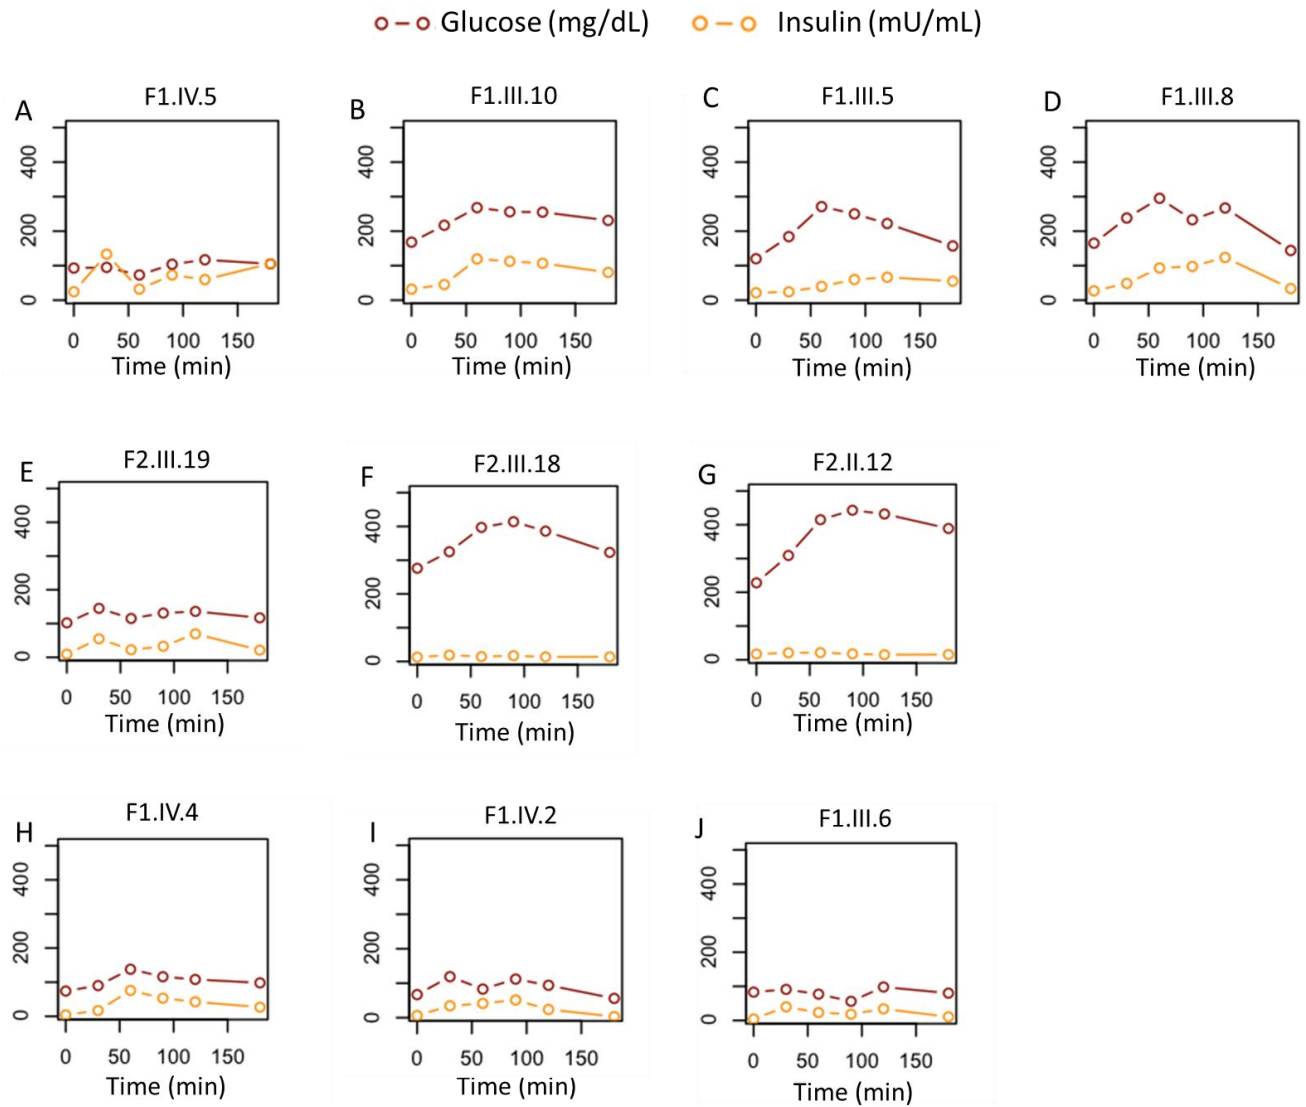

**Supplemental Figure S1.** Glucose tolerance curves. Blood glucose (brown) and plasma insulin levels (yellow) in response to a 75 g oral glucose charge measured at fasting, 30-, 60-, 90-, 120-, and 180-minutes after oral glucose intake. (A-D) Carriers of p.Arg252His, (E-G) carriers of p.Lys68Gln, and (H-J) non-carriers.

**Supplemental Table S1.** Variants on *DYRK1B* in a sample of 968 Mexican Mestizos.

| Variant     | Position | Allele Frequency % (allele number) | Major/minor allele | Annotation                 | Consequence |
|-------------|----------|------------------------------------|--------------------|----------------------------|-------------|
| rs746933234 | 40318989 | 0.052 (1)                          | C/T                | Missense                   | p.Arg252His |
| rs373850179 | 40321185 | 0.052 (1)                          | T/G                | Missense                   | p.Lys68Gln  |
| rs34587974  | 40321404 | 0.258 (5)                          | A/G                | Missense                   | p.Leu28Pro  |
| rs752428936 | 40317417 | 0.052 (1)                          | C/T                | Missense                   | p.Asp436Asn |
| rs148788670 | 40316512 | 0.052 (1)                          | G/A                | Missense                   | p.Pro578Leu |
| rs144370928 | 40321178 | 0.052 (1)                          | C/T                | Missense                   | p.Arg70Gln  |
| rs771417583 | 40316579 | 0.052 (1)                          | T/G                | Missense                   | p.Thr556Pro |
| rs149054894 | 40321322 | 0.052 (1)                          | G/A                | Synonymous                 | p.Thr55Thr  |
| rs146996483 | 40318018 | 0.362(7)                           | G/A                | Synonymous                 | p.Ala334Ala |
| rs779778950 | 40318985 | 0.052 (1)                          | G/A                | Synonymous                 | p.Ser253Ser |
| rs759826670 | 40319144 | 0.052 (1)                          | G/C                | Synonymous                 | p.Leu200Leu |
| rs758562354 | 40320638 | 0.052 (1)                          | C/T                | Synonymous                 | p.Gln134Gln |
| rs538648311 | 40321054 | 0.052 (1)                          | G/A                | Synonymous                 | p.Tyr111Tyr |
| rs371524346 | 40321087 | 0.052 (1)                          | G/A                | Synonymous                 | p.Ile100Ile |
| rs370695515 | 40317421 | 0.103 (2)                          | C/T                | Synonymous                 | p.Thr434Thr |
| rs751446560 | 40316679 | 0.207 (4)                          | G/A                | Synonymous                 | p.Pro522Pro |
| rs765204866 | 40320714 | 0.103 (2)                          | G/C                | Non coding transcript exon | NA          |
| rs56077108  | 40319227 | 2.738 (53)                         | C/T                | Splice region              | NA          |
| rs201207939 | 40318138 | 0.052 (1)                          | G/A                | Intron                     | NA          |
| rs377517922 | 40316949 | 0.052 (1)                          | G/A                | Intron                     | NA          |
| rs147939499 | 40316754 | 0.052 (1)                          | T/C                | Intron                     | NA          |
| rs76318664  | 40319232 | 0.155 (3)                          | G/A                | Intron                     | NA          |
| rs112350522 | 40319260 | 0.258 (5)                          | C/T                | Intron                     | NA          |
| rs118167426 | 40318132 | 0.620 (12)                         | C/T                | Intron                     | NA          |
| rs56110449  | 40318087 | 28.822 (558)                       | G/A                | Intron                     | NA          |
| rs772833215 | 40316742 | 0.052 (1)                          | A/G                | Intron                     | NA          |
| rs780638095 | 40318314 | 0.052 (1)                          | G/A                | Intron                     | NA          |
| rs755640697 | 40318332 | 0.052 (1)                          | C/T                | Intron                     | NA          |
| rs769863099 | 40316954 | 0.052 (1)                          | G/T                | Intron                     | NA          |

NA: Not apply

**Supplemental Table S2.** Pulse wave velocity and other biochemical studies.

| Variant status  | ID     | PWV | AORTIC AU | Alx | Alx_75% | LDL-c (mg/dL) | Uric Acid (mg/dL) | CR-S (mg/dL) | ALT (IU/L) | AST (IU/L) | GGT (IU/L) | APO_B (mg/dL) | ACR (mg/dL) | HOMA-IR | Matsuda Index | Insulinogenic Index |
|-----------------|--------|-----|-----------|-----|---------|---------------|-------------------|--------------|------------|------------|------------|---------------|-------------|---------|---------------|---------------------|
| p.Arg252His     | IV.5   | 4.3 | 15        | 31  | 32      | 63            | 7.7               | 0.7          | 13         | 22         | 13         | 59.8          | -           | 5.61    | 2.58          | 54.37               |
|                 | III.10 | 7.1 | 12        | 28  | 28      | -             | 4.1               | 0.54         | 55         | 43         | 30         | 108.1         | 18.7        | 13.19   | 0.95          | 0.27                |
|                 | III.8  | 6.1 | 25        | 45  | 43      | -             | 3.9               | 0.62         | 24         | 25         | 25         | 109.9         | 1.8         | 10.96   | 1.07          | 0.29                |
|                 | III.5  | 6.6 | 15        | 47  | 42      | -             | 5.4               | 0.88         | 54         | 47         | 38         | 69.2          | 4.9         | 6.34    | 2.06          | 0.04                |
| p.Lys68Gln      | III.19 | 5.6 | 4         | 9   | 12      | 70            | 6.5               | 0.75         | 22         | 22         | 22         | 65.6          | -           | 2.36    | 5.03          | 1.05                |
|                 | III.18 | 6.6 | 6         | 15  | 17      | 108           | 5.4               | 0.55         | 25         | 23         | 30         | 110.4         | 163.1       | 8.72    | 2.2           | 0.12                |
|                 | II.12  | 6.3 | 23        | 47  | 43      | 79            | 8                 | 0.95         | 21         | 21         | 16         | 89.2          | 252.4       | 9.62    | 1.9           | 0.04                |
| F1. non-carrier | IV.4   | 3.6 | 6         | 19  | 12      | 52            | 5.8               | 0.8          | 35         | 32         | 17         | 52.8          | -           | 0.72    | 8.6           | 0.8                 |
|                 | IV.2   | 4.7 | 14        | 35  | 26      | 114           | 3                 | 0.63         | 16         | 21         | 8          | 83.9          | -           | 0.84    | 12.21         | 4.45                |
|                 | III.6  | 5.4 | 20        | 53  | 50      | 95            | 3.1               | 0.42         | 12         | 17         | 6          | 79.5          | -           | 1.03    | 8.28          | 0.54                |

ID, identification; PVW, pulse wave velocity; AU, augmentation; Alx, augmentation index; Alx\_75%, corrected augmentation index to 75%; LDL-c, low density lipoprotein cholesterol; CR-S, creatinine serum; ALT, alanine aminotransferase; AST, aspartate aminotransferase; GGT, gamma glutamine transferase; APO\_B, apolipoprotein B; ACR, urine albumin/creatinine ratio; HOMA-IR; homeostatic model assessment for insulin resistance.
